# Supplementary material for: Fibroblasts as an in vitro model of circadian genetic and genomic studies
Source: PubMed Central journal article supplement (PMC11329553; doi:10.1007/s00335-024-10050-7), 2024-07-03

2013L01115-TP-0 **4.6**

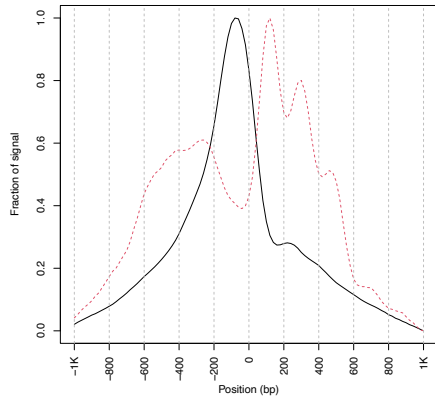

2013L01115-TP-4. **3.1**

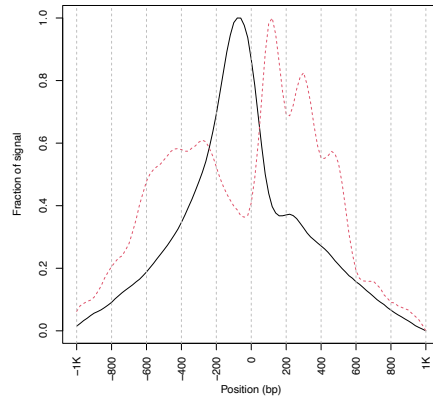

2013L01115-TP-8 **4.3**

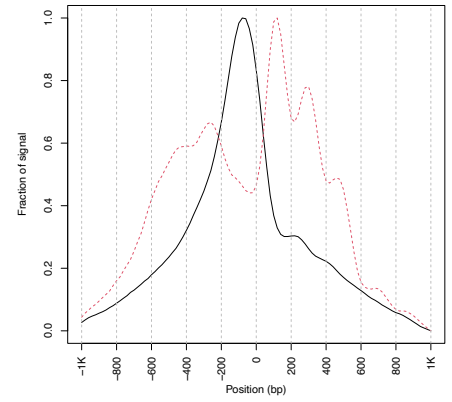

2013L01115-TP-12 **3.9**

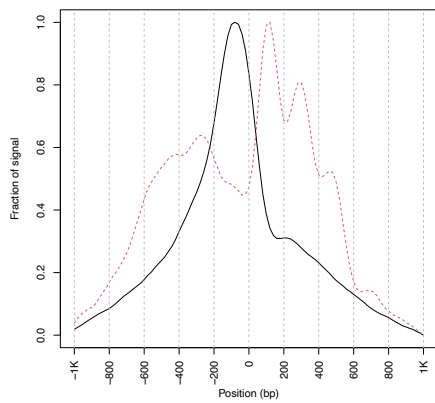

2013L01115-TP-16 **3.2**

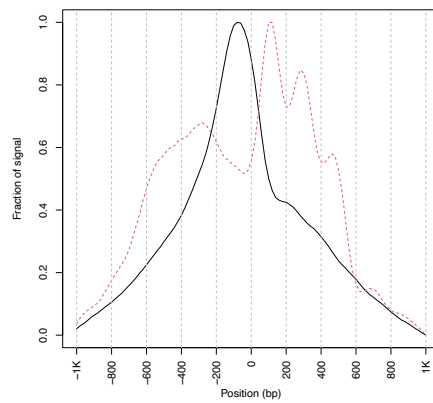

2013L01115-TP-20 **3.4**

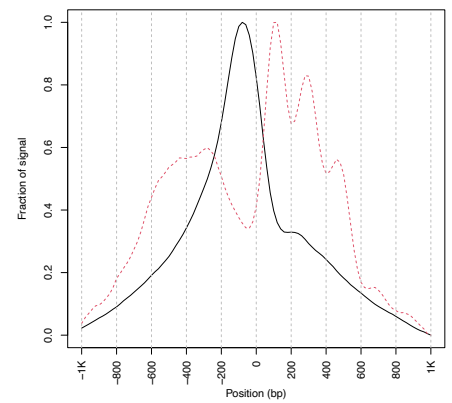

2013L01115-TP-24 **2.8**

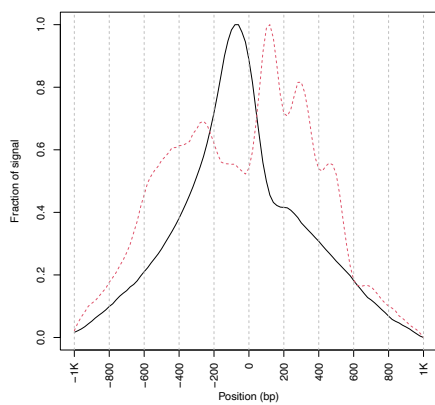

2013L01115-TP-28. **2.6**

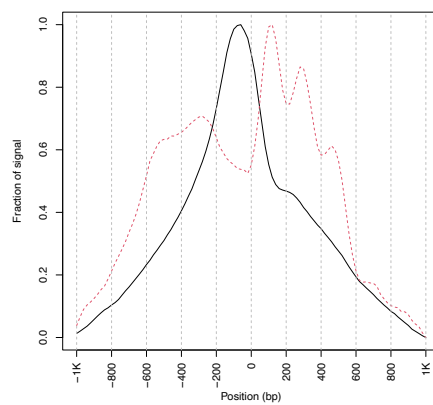

2013L01115-TP-32. **3.5**

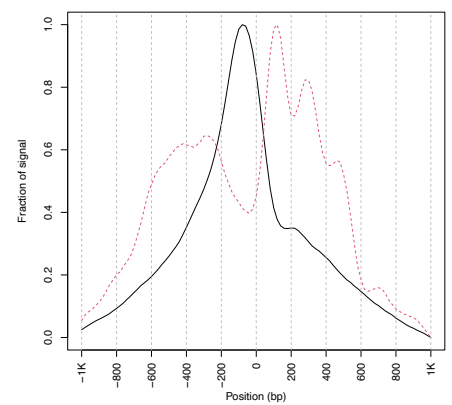

2013L01115-TP-36 **3.2**

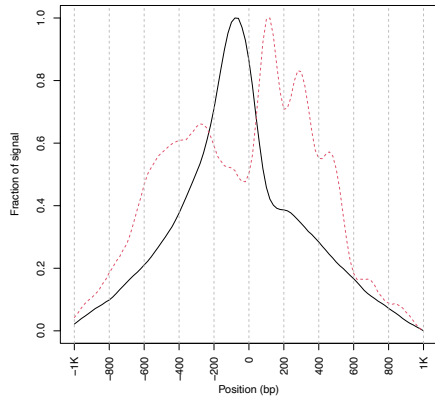

2013L01115-TP-40 **2.6**

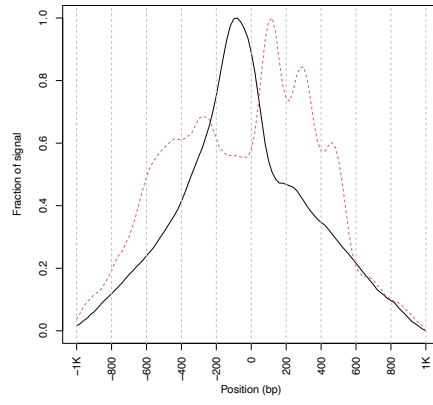

2013L01115-TP-44 **2.6**

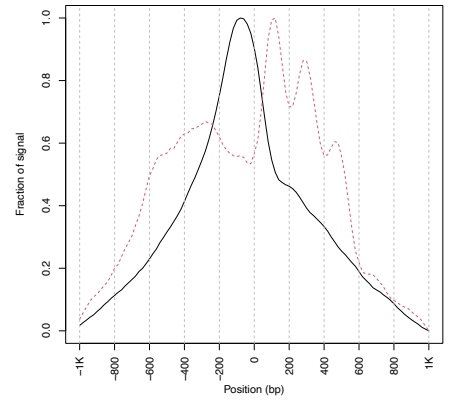

2013L01115-TP-48 **2.8**

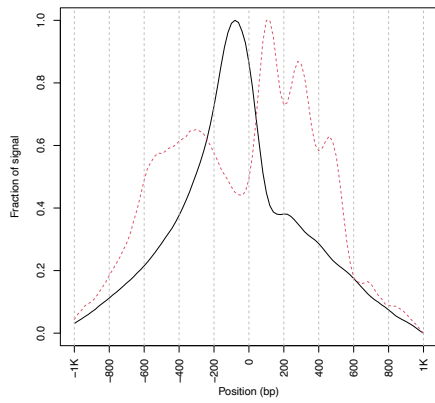



2014L00478-TP-36 **3.0**

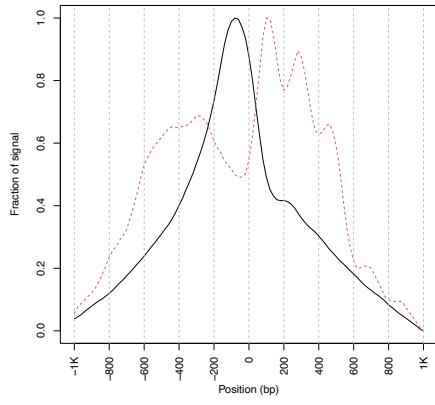

2014L00478-TP-40 **3.4**

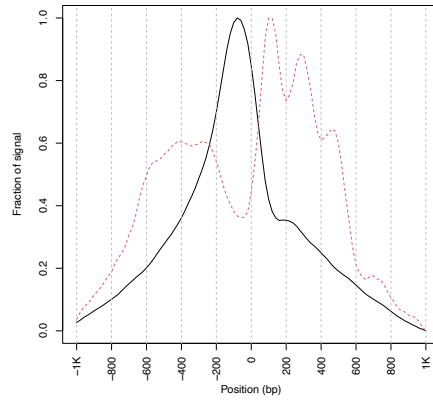

2014L00478-TP-44 **3.1**

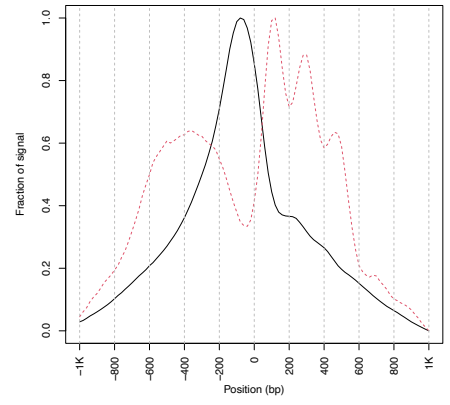

2014L00478-TP-48 **2.7**

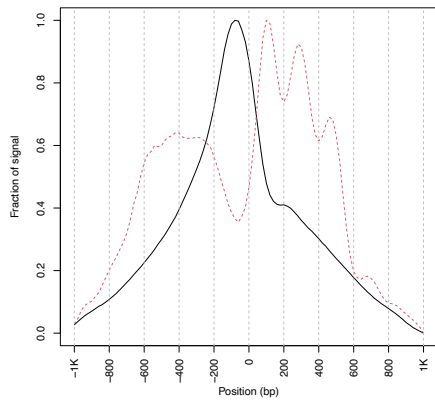

2014L00641-TP-0 3.1

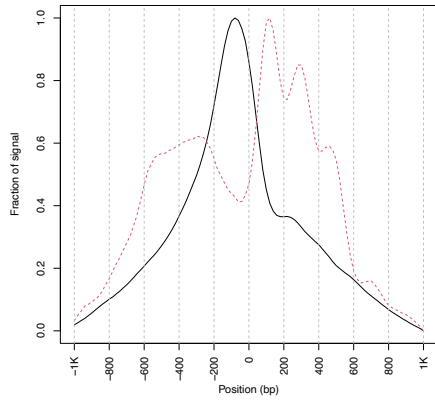

2014L00641-TP-4 3.1

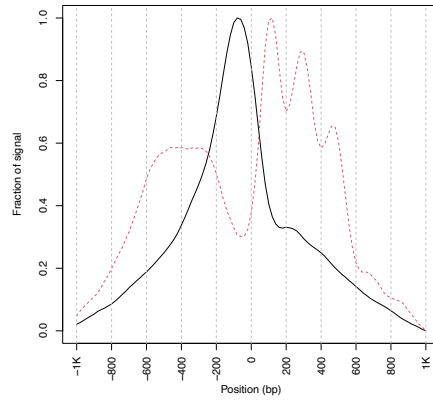

2014L00641-TP-8 3.6

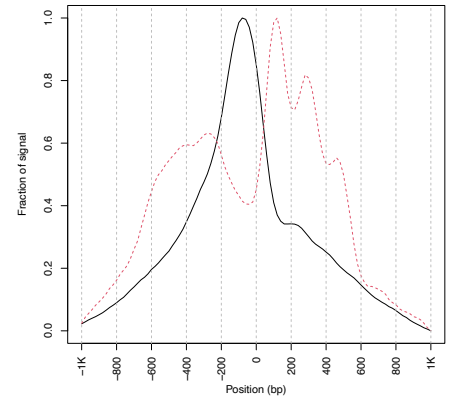

2014L00641-TP-12 3.2

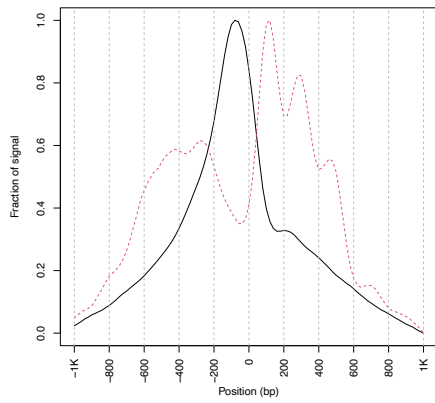

2014L00641-TP-16 3.0

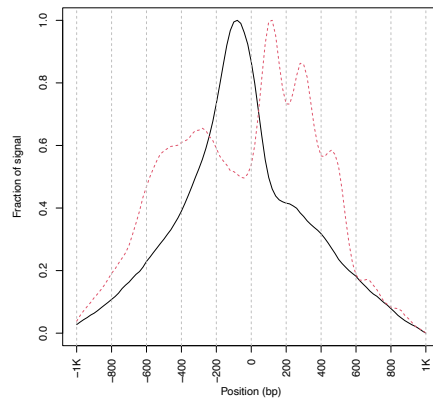

2014L00641-TP-20 3.2

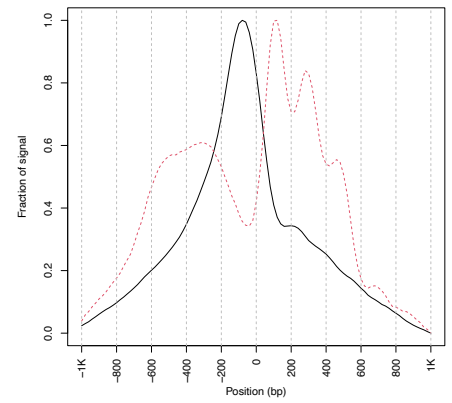

2014L00641-TP-24 3.0

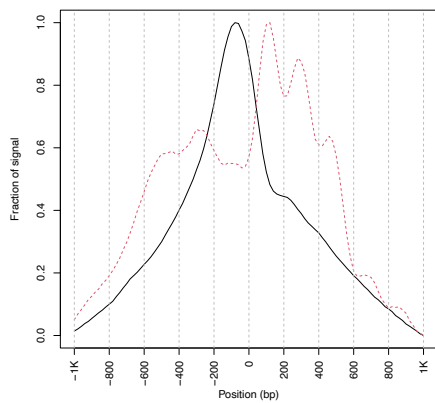

2014L00641-TP-28 2.8

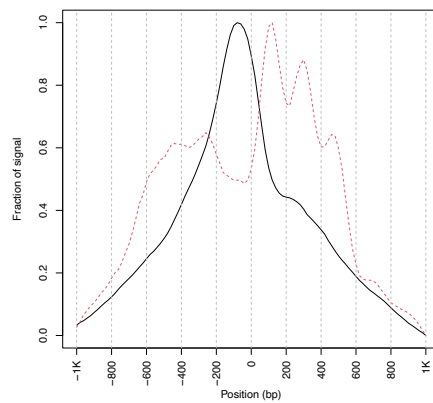

2014L00641-TP-32 2.4

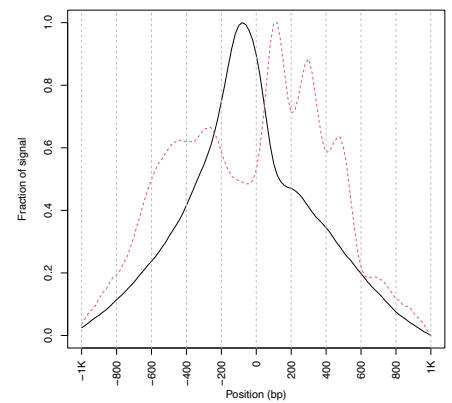

2014L00641-TP-36 **3.2**

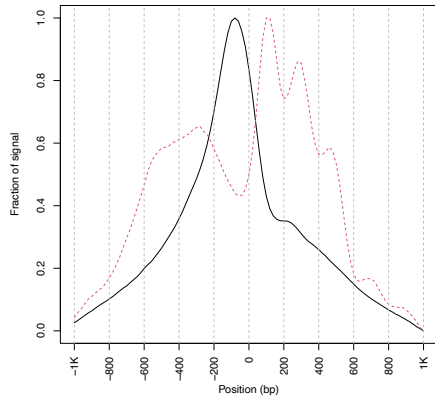

2014L00641-TP-40 **3.0**

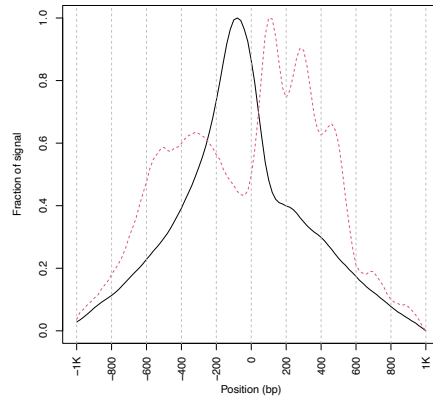

2014L00641-TP-44 **2.6**

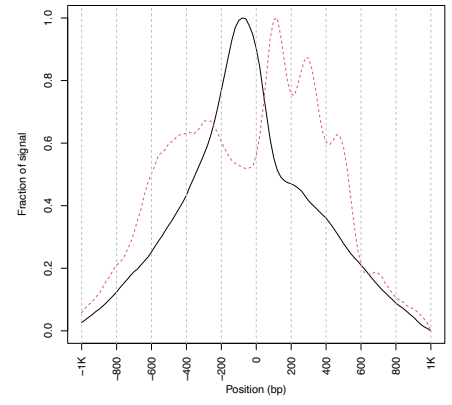

2014L00641-TP-48 **3.1**

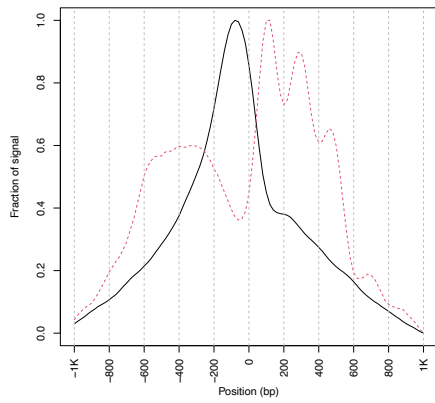

2014L00966-TP-4 **3.3**

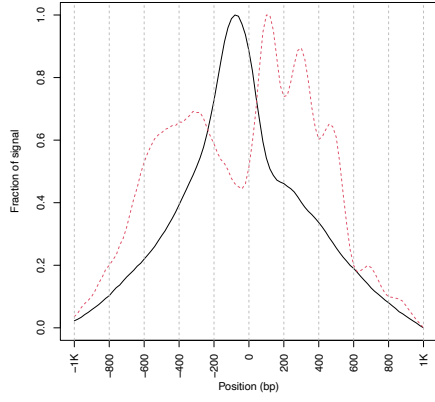

2014L00966-TP-8 **3.0**

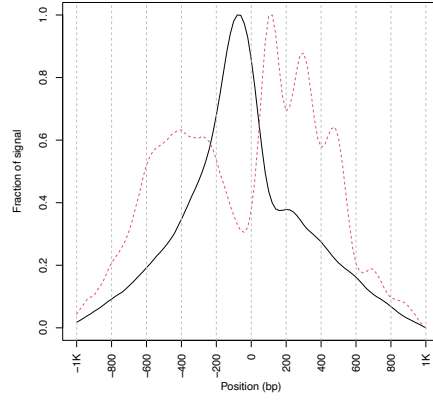

2014L00966-TP-12 **2.6**

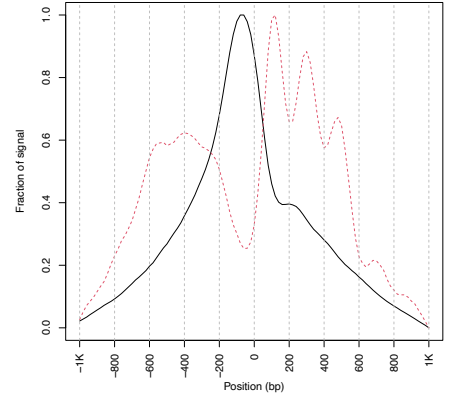

2014L00966-TP-16 **4.0**

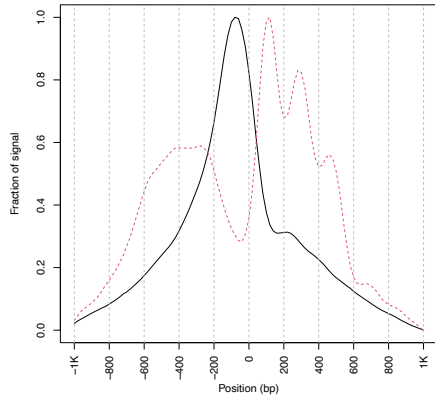

2014L00966-TP-24 **2.5**

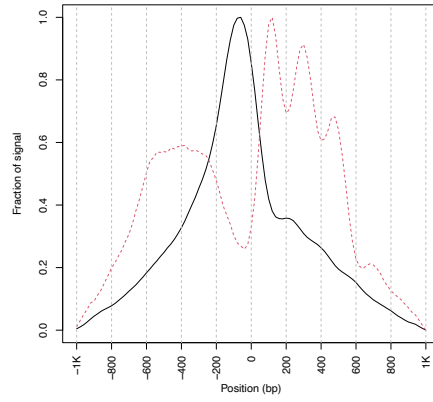

2014L00966-TP-28 **2.8**

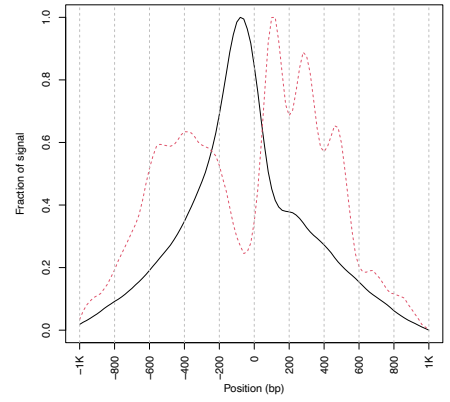

2014L00966-TP-32 **2.6**

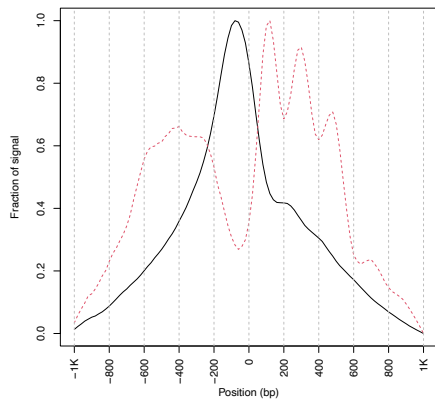

2014L00966-TP-36 **2.8**

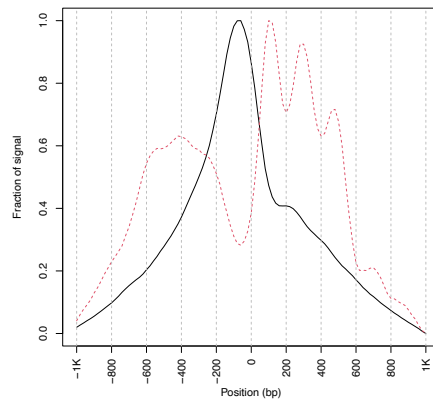

2014L00966-TP-40 **3.6**

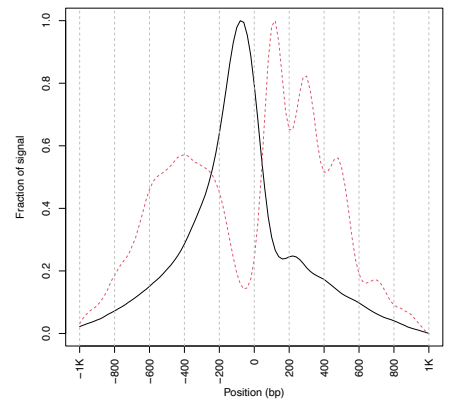

2014L00966-TP-44 **3.7**

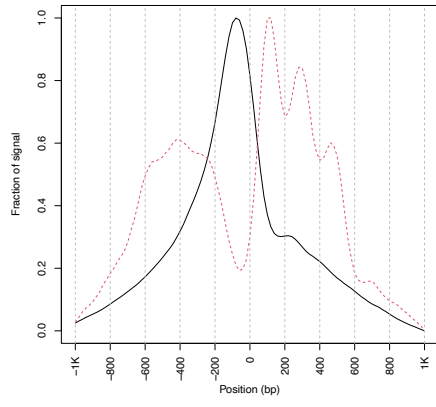

2014L00966-TP-48 **3.0**

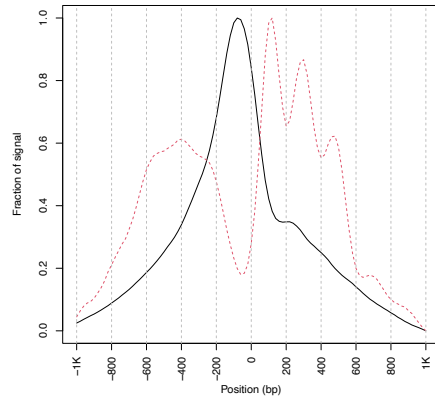



2014L01145-TP-0 3.5

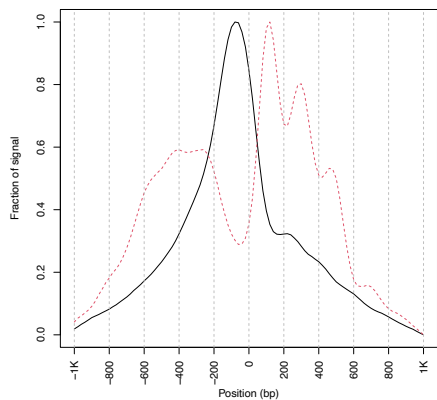

2014L01145-TP-4 4.1

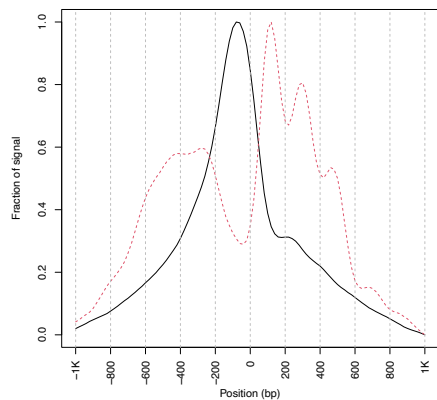

2014L01145-TP-8 3.5

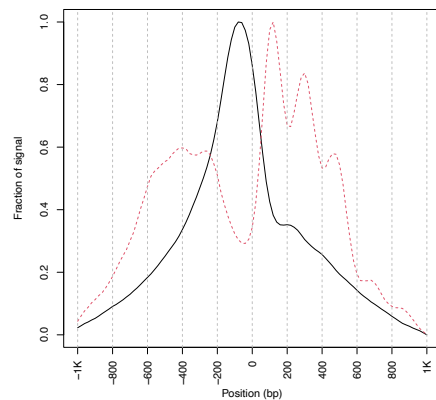

2014L01145-TP-12 3.8

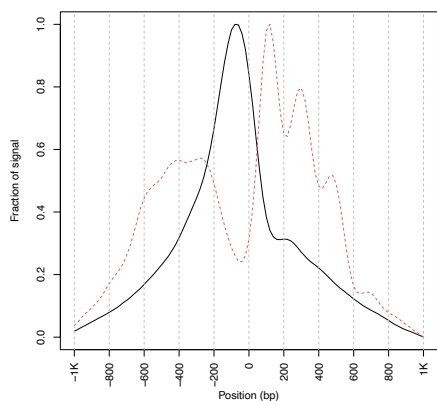

2014L01145-TP-16 3.7

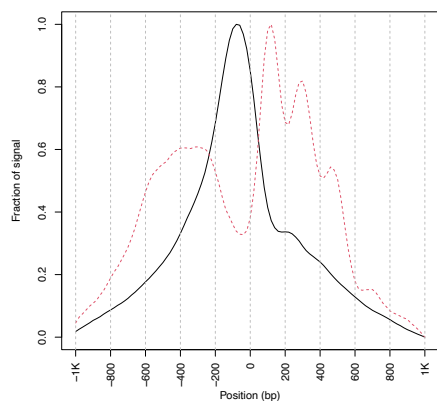

2014L01145-TP-20 4.5

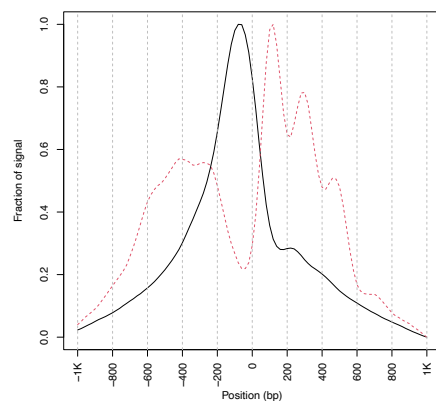

2014L01145-TP-24 4.7

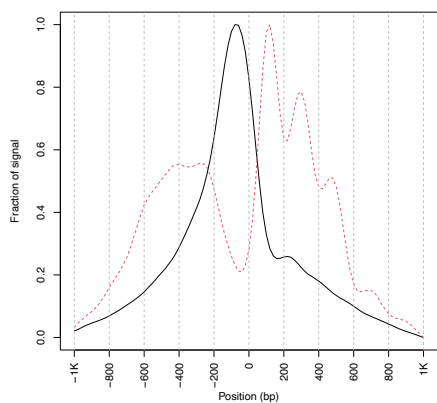

2014L01145-TP-28 3.5

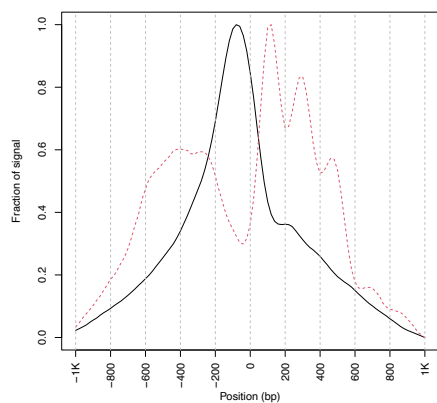

2014L01145-TP-32 3.1

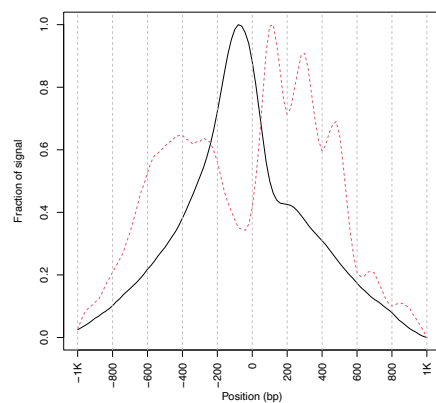

2014L01145-TP-36 **3.5**

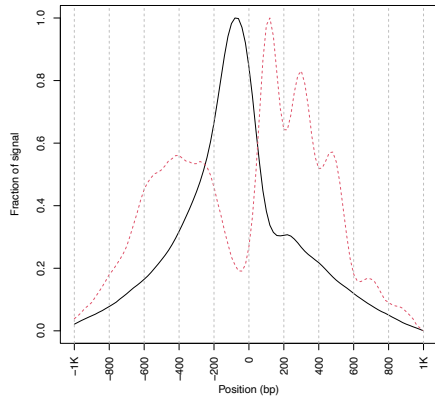

2014L01145-TP-40 **4.1**

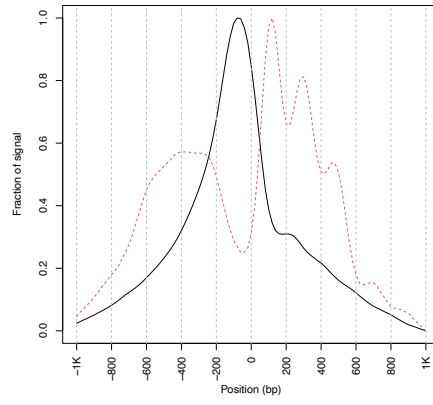

2014L01145-TP-44 **4.2**

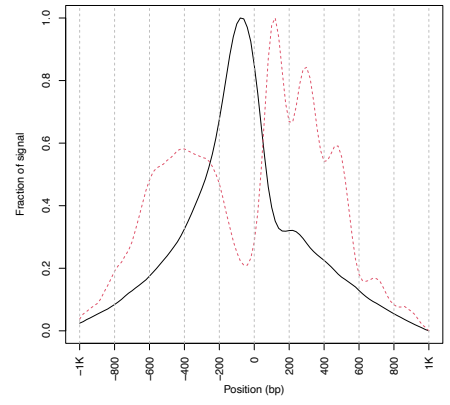

2014L01145-TP-48 **3.9**

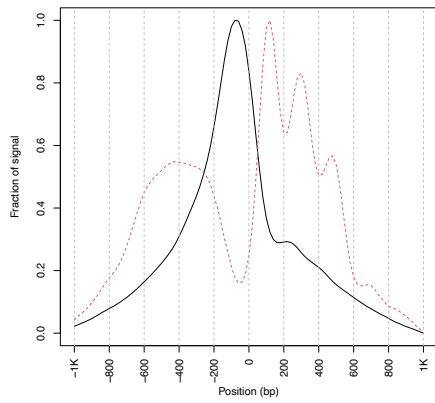

2014L01249-TP-0 4.1

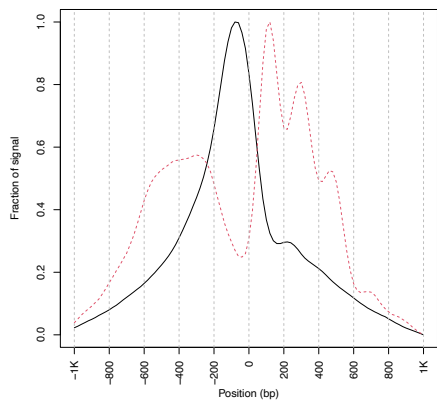

2014L01249-TP-4 4.2

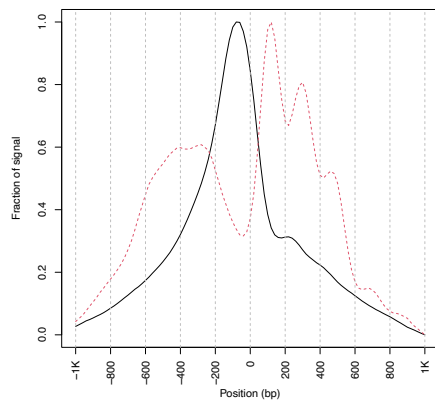

2014L01249-TP-8 3.5

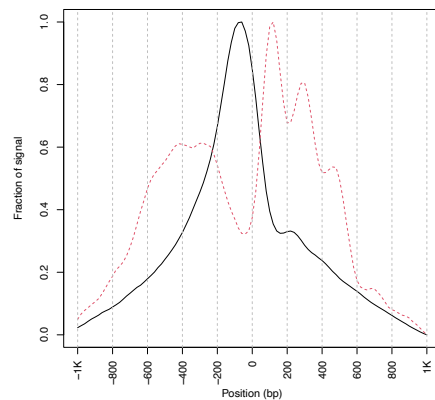

2014L01249-TP-12 4.1

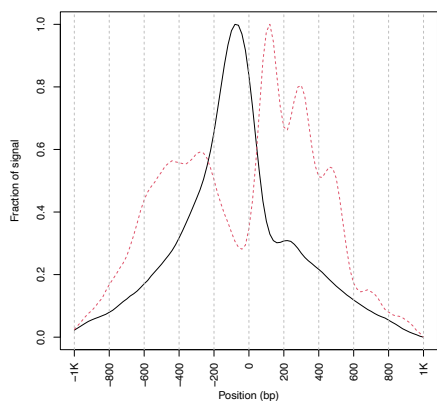

2014L01249-TP-16 3.8

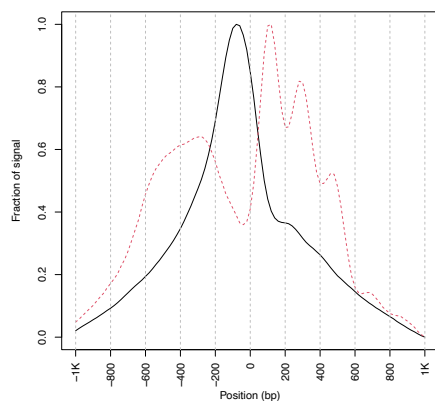

2014L01249-TP-20 4.6

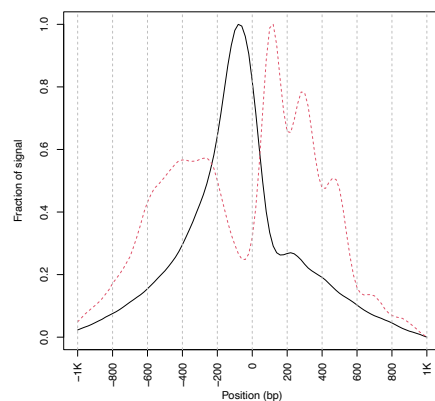

2014L01249-TP-24 4.1

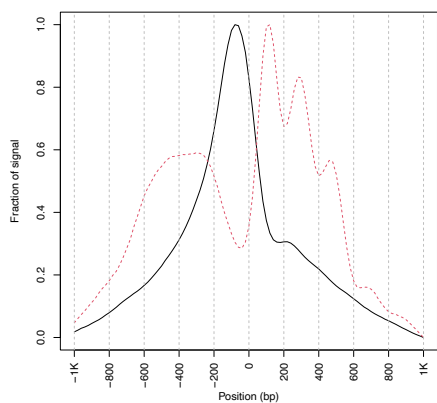

2014L01249-TP-28 3.2

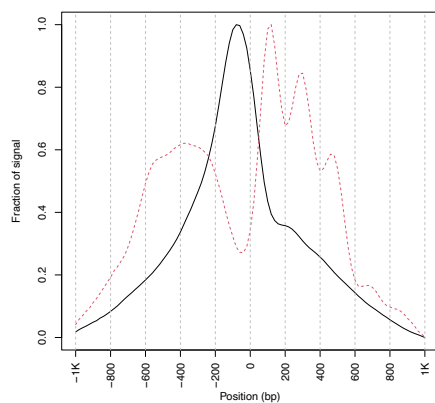

2014L01249-TP-32 2.7

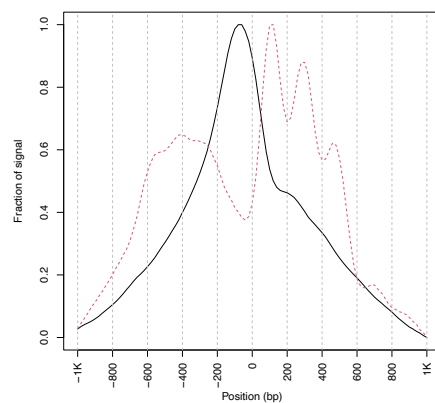

2014L01249-TP-36 **3.7**

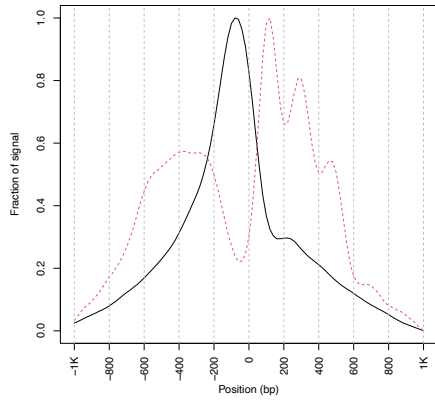

2014L01249-TP-40 **4.7**

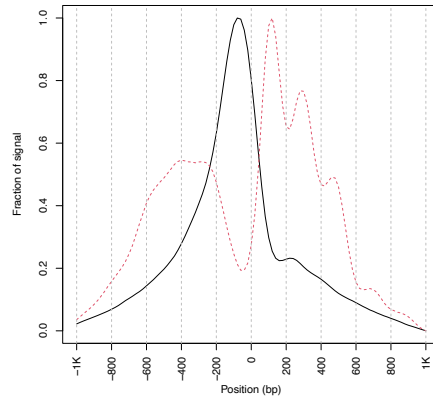

2014L01249-TP-44 **4.2**

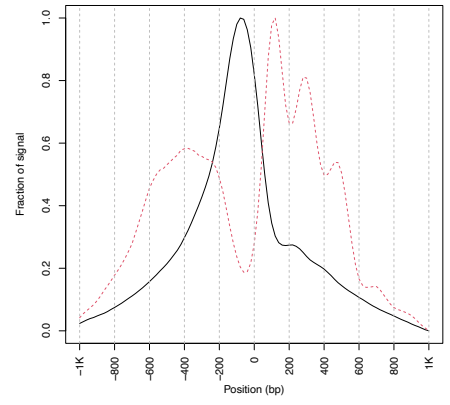

2014L01249-TP-48 **3.6**

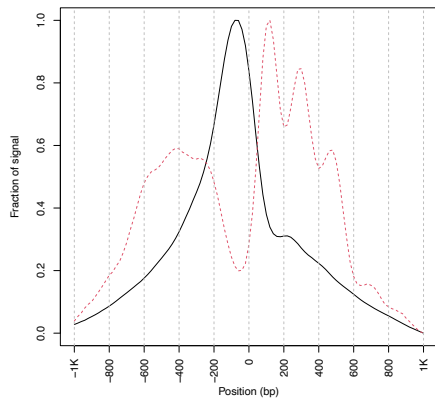

Supplement: 335_2024_10050_MOESM9_ESM.pdf [file 335_2024_10050_MOESM9_ESM.pdf]
